# Supplementary material for: Functional Assessment of EnvZ/OmpR Two-Component System in Shewanella oneidensis
Source: PubMed Central journal article supplement (PMC3160321; doi:10.1371/journal.pone.0023701), 2011-08-23
Supplement: pone.0023701.s001.pdf [file pone.0023701.s001.pdf]

TABLE S1. Primers used in this study

|                 |                                                  |
|-----------------|--------------------------------------------------|
| Mutagenesis     |                                                  |
| SO4633-5-F      | TACTCAGAGCTCCCACCAAAG                            |
| SO4633-5-R      | CCCATCCACTAAGTTTAAACATGCTCGTAGGCGCATATC          |
| SO4633-3-F      | TGTTTAAACTTAGTGGATGGGTTTGTGCCCGACGGTGCC          |
| SO4633-3-R      | CCGTAGTAGGGAGCTCGTTTCG                           |
| SO4634-5-F      | GGCTATGTGTTTGAGCTCGAC                            |
| SO4634-5-R      | CCCATCCACTAAGTTTAAACATTCGATACCTGCTTCGCG          |
| SO4634-3-F      | TGTTTAAACTTAGTGGATGGGGCCCAAGTTTGGCTACCG          |
| SO4634-3-R      | GGAGGCTGCGAGCTCCAGTT                             |
| SO0557-5-O      | GGGGACAAGTTTGTACAAAAAAGCAGGCTCGGAAAATAAGGGGAAACG |
| SO0557-5-I      | CCAATACTGCGTGACCTGATATTGCACGCGATAAAACG           |
| SO0557-3-O      | GGGGACCACTTTGTACAAGAAAGCTGGGTTTATGGCACCCCTAAAGG  |
| SO0557-3-I      | ATCAGGTCACGCAGTATTGGGTGCAACTTCTCAAGCAG           |
| SO0557-LF       | CCGATAACTCAATTACCACC                             |
| SO0557-LR       | GCAGGCTCTATGACATCC                               |
| SO0557-SF       | CGGAAAATAAGGGGAAACG                              |
| SO0557-SR       | ACAATGCTAAAACCCAATGG                             |
| Complementation |                                                  |
| SO4633/4-COM-F  | CTCGAGCTCTGTGCGCATTCGACTGCCG                     |
| SO4633/4-COM-R  | AATGAGCTCCCCAATGTCAGCGTTGTCAT                    |
| Northern        |                                                  |
| SO4633-N-F      | TATGCGCCTACGAGCACTCC                             |
| SO4633-N-R      | AATCCGCGCCAATAGTTCC                              |
| SO4634-N-F      | GAACACTTAACCATAGTCG                              |
| SO4634-N-R      | GATCACCATTAAGTACAAGG                             |
| SO4635-N-F      | CAACCCAAGACAATTACTCG                             |
| SO4635-N-R      | AGTTCATCCGCTTCTTGC                               |
| qRT-PCR         |                                                  |
| 16S-RT-F        | CAGCACAAGTGAGTTTACTC                             |
| 16S-RT-R        | GCAGTCGTTTCCAAGTGTTA                             |
| SO4633-RT-F     | GTGATGCTGACGGCTAAGGG                             |
| SO4633-RT-R     | ATAGTTCCCGCGGGTTAAAC                             |
| SO4634-RT-F     | GCCGAAGTCCGTGTCACCCA                             |
| SO4634-RT-R     | CGTTTTGACCAATCAGCGGT                             |
| SO3988-RT-F     | GTGAATAGCGCTGGTAACGA                             |
| SO3988-RT-R     | GGCTTACGAGAGAACGGCTG                             |
| SO0312-RT-F     | AGCTTTGAACGCAGCGAGAG                             |
| SO0312-RT-R     | CACCTTGCATCACTAAACTG                             |
| SO1420-RT-F     | GGTGTTAAGCACAGCACTTA                             |
| SO1420-RT-R     | AGGAGTAATTGTCCATTGCA                             |
| SO1557-RT-F     | ACGGGTGCTGCATCGAGCGA                             |
| SO1557-RT-R     | ATAACGTGTCGTTACGACCC                             |

|             |                      |
|-------------|----------------------|
| SO1821-RT-F | ATCGGTAAACAATGGGGAGC |
| SO1821-RT-R | CTTTGTTAAAGGTGTAAACA |
| SO3060-RT-F | ACTACTGACGTGCTCAATGC |
| SO3060-RT-R | GCAGCGCCGCGTCAGCACGA |
| SO3896-RT-F | GGTTCTGGTGATGTGTTTAA |
| SO3896-RT-R | CTTGTTTAAATACAGTGTCA |

Two-hybrid assay

|             |                              |
|-------------|------------------------------|
| SO1327-TH-F | GGAATTCTATGGCCACAGTTGAATTAG  |
| SO1327-TH-R | CCGCTCGAGTTAGGCTTTAGCCTGTAAG |
| SO4633-TH-F | GGAATTCAGATGGGACAAGAAACCTCG  |
| SO4633-TH-R | GACTAGTTCATCGCCGGGCGGCAC     |
| SO4634-TH-F | GGAATTCGGTGTATGTGTTAAAGCCCAG |
| SO4634-TH-R | GAAGATCTTATTCTCGCGGTAGCCAAAC |

---
